# Supplementary material for: Chronotype, circadian rhythm, and psychiatric disorders: Recent evidence and potential mechanisms
Source: PubMed Central journal article supplement (PMC9399511; doi:10.3389/fnins.2022.811771), 2022-08-10
Supplement: Table_1.pdf [file Table_1.pdf]

## Table Questionnaires for chronotype

| Name | Questions | Variables                                                                                                                                                                                                                                  | Evaluation & Classification                                                                                                                                                                    |
|------|-----------|--------------------------------------------------------------------------------------------------------------------------------------------------------------------------------------------------------------------------------------------|------------------------------------------------------------------------------------------------------------------------------------------------------------------------------------------------|
| MEQ  | 19 items  | <ul style="list-style-type: none"> <li>● Sleep and wake-up times</li> <li>● Preferred times for physical and Mental activity</li> <li>● Subjective alertness</li> </ul>                                                                    | Definitely morning type      70-86<br>Moderately morning type      59-69<br>Intermediate type              42-58<br>Moderately evening type      31-41<br>Definitely evening type        16-30 |
| MCTQ | 29 items  | <b>(workdays and work-free days)</b> <ul style="list-style-type: none"> <li>● <math>SO_w/SO_f</math></li> <li>● <math>GU_w/GU_f</math></li> <li>● <math>SD_w/SD_f</math></li> <li>● <math>TBT_w/TBT_f</math></li> <li>● MSW/MSF</li> </ul> | <b>MSFsc</b>                                                                                                                                                                                   |
| CSM  | 13 items  | <ul style="list-style-type: none"> <li>● Activity planning</li> <li>● Morning alertness</li> <li>● Evening alertness</li> </ul>                                                                                                            | Morning Type                  44-55<br>Intermediate Type              23-43<br>Evening Type                    13-22                                                                           |

SO: sleep onset; GU: local time of getting out of bed; SD: sleep duration; TBT: total time in bed; MS: mid-sleep. MSFsc: the mid-sleep on work-free days corrected for “oversleep” due to the sleep debt accumulated during the workdays, calculation: If  $SD_f \leq SD_w$ ,  $MSFsc = MSF$  or If  $SD_f > SD_w$ ,  $MSFsc = MSF - (SD_f - SD_w)/2$ . The categorization of chronotype by using MCTQ is based on quantile of the MSFsc scores in samples.
